# Supplementary material
Source: HighWire-hosted journal article supplement (http://jpet.aspetjournals.org/highwire/filestream/154307/field_highwire_adjunct_files/0/1666_supp_data.pdf)
Supplement: 1666_supp_data.pdf [file 1666_supp_data.pdf]

## **Pharmacologic Inhibition of TRPA1 Counteract CS Tear Gas Agent-induced Cutaneous Injuries**

Satyanarayana Achanta<sup>1\*</sup>, Narendranath Reddy Chintagari<sup>2§</sup>, Shrilatha Balakrishna<sup>2ψ</sup>, Boyi Liu<sup>1†</sup>, and Sven-Eric Jordt<sup>1,3,4\*</sup>

<sup>1</sup>Center for Translational Pain Medicine, Department of Anesthesiology, Duke University School of Medicine, Durham, NC-27710, USA

<sup>2</sup>Department of Pharmacology, Yale University School of Medicine, New Haven, CT – 06520, USA

<sup>3</sup>Department of Pharmacology & Cancer Biology, Duke University School of Medicine, Durham, NC-27710, USA

<sup>4</sup>Integrated Toxicology and Environmental Health Program (ITEHP), Nicholas School of the Environment, Duke University, Durham, NC-27710, USA

### *Current affiliations:*

<sup>§</sup>US Food and Drug Administration (FDA), Bethesda, MD, USA

<sup>ψ</sup>Office of Animal Research Support, Yale University, 25 Science Park, New Haven, CT, USA

<sup>†</sup>Department of Neurobiology and Acupuncture Research, The Third Clinical Medical College, Zhejiang Chinese Medical University, Key Laboratory of Acupuncture and Neurology of Zhejiang Province, Hangzhou, 310053, China

We optimized the solvent for dissolving CS tear gas agent for application on mouse ears. We tested common solvents such as dimethyl sulfoxide (DMSO) and dichloromethane (DCM). CS dissolved in DCM remained like a powder on the ears after application. This might be explained by the higher vapor pressure of DCM (350 Torr) compared to the lower vapor pressure of DMSO (0.6 Torr). Application of CS tear gas agent dissolved in DMSO gave robust inflammation response in mouse models compared to DCM (Figure S1). Therefore, we chose DMSO as a solvent for CS tear gas skin injury studies. Further, DCM has relatively more toxic effects compared to DMSO.

Figure S1

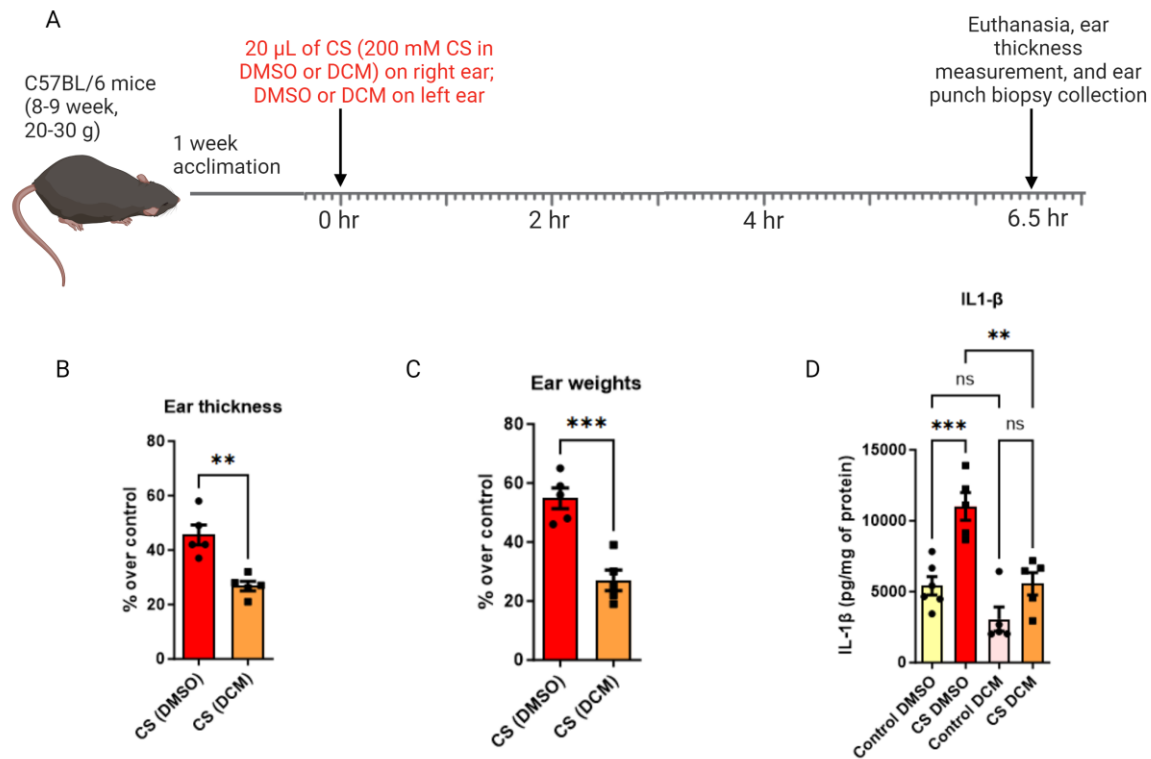

**Figure S1. Effects of solvents on CS tear gas agent-induced cutaneous inflammation.** (A) Study paradigm. Right ears of C57BL/6 male mice were exposed to 20  $\mu$ L of CS (200 mM, dissolved in either DMSO or DCM) and left ears to DMSO or DCM (vehicle, 20  $\mu$ L). At 6.5 hours post-CS exposure, mice were euthanized, ear thickness was measured, and ear punch biopsies were collected. (B-D) Ear thickness, ear punch biopsy weights, and pro-inflammatory cytokine (IL-1 $\beta$ ) assessment. Data were analyzed by either Student's t-test or one-way ANOVA with Tukey's post-hoc multiple comparison test. Data are presented as mean  $\pm$  SEM, n=5 per group. \* p<0.05, \*\* p<0.01, \*\*\* p<0.001, ns = non-significant.

We optimized the concentration of CS tear gas for the mouse ear inflammation model. We dissolved CS in DMSO at various molar concentrations (50, 100, and 200 mM) and applied to mouse ears. Across studied parameters (ear thickness, ear punch biopsy weights, extravasation of inflammatory exudate, and IL-1 $\beta$  pro-inflammatory cytokine), there was no statistically significant difference among the tested CS concentrations (Figure S2). We chose 200 mM concentration as this concentration gave a robust injury phenotype. Further, we wanted to test potential therapeutic compounds in a model that represents severe injury phenotype in humans.

Figure S2

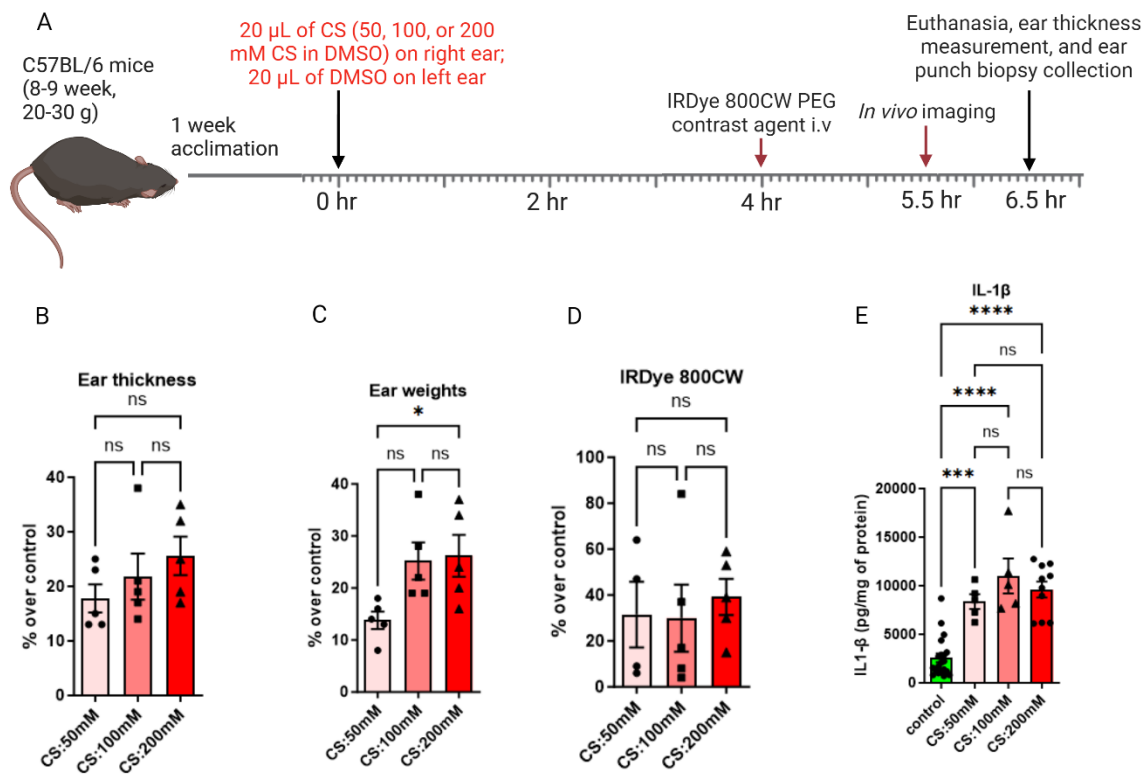

**Figure S2. Titration of CS tear gas concentration for optimization of mouse ear skin injury model.** (A) Study paradigm. Right ears of C57BL/6 male mice were exposed to 20  $\mu$ L of CS at various molar concentrations (50, 100, and 200 mM, dissolved in DMSO) and left ears to DMSO (vehicle, 20  $\mu$ L). At 4 hours post-CS exposure, mice were injected with IRDye 800CW contrast agent intravenously (i.v) and *in vivo* imaging was performed at 5.5 hours post-CS exposure. At 6.5 hours post-CS exposure, mice were euthanized, ear thickness was measured, and ear punch biopsies were collected. (B-F) Ear thickness, ear punch biopsy weights, extravasation of pro-inflammatory exudate, and pro-inflammatory cytokine (IL-1 $\beta$ ) assessments. Data were analyzed by one-way ANOVA with Tukey's post-hoc multiple comparison test. Data are presented as mean  $\pm$  SEM, n=5 per group. \*  $p \leq 0.05$ , \*\*  $p \leq 0.01$ , \*\*\*  $p \leq 0.001$ , \*\*\*\*  $p \leq 0.0001$ , ns = non-significant.

To assess the decontamination efficacy of water washing after skin exposure to CS tear gas agent, 30 minutes after CS exposure, we washed both surfaces of ears three times with fresh cotton applicators moistened in water. Decontamination of CS-exposed mouse ear skin with water washing did not improve the studied parameters such as ear thickness, ear punch biopsy weights, and IL-1 $\beta$  pro-inflammatory cytokine measured in ear punch biopsy homogenate

Figure S3

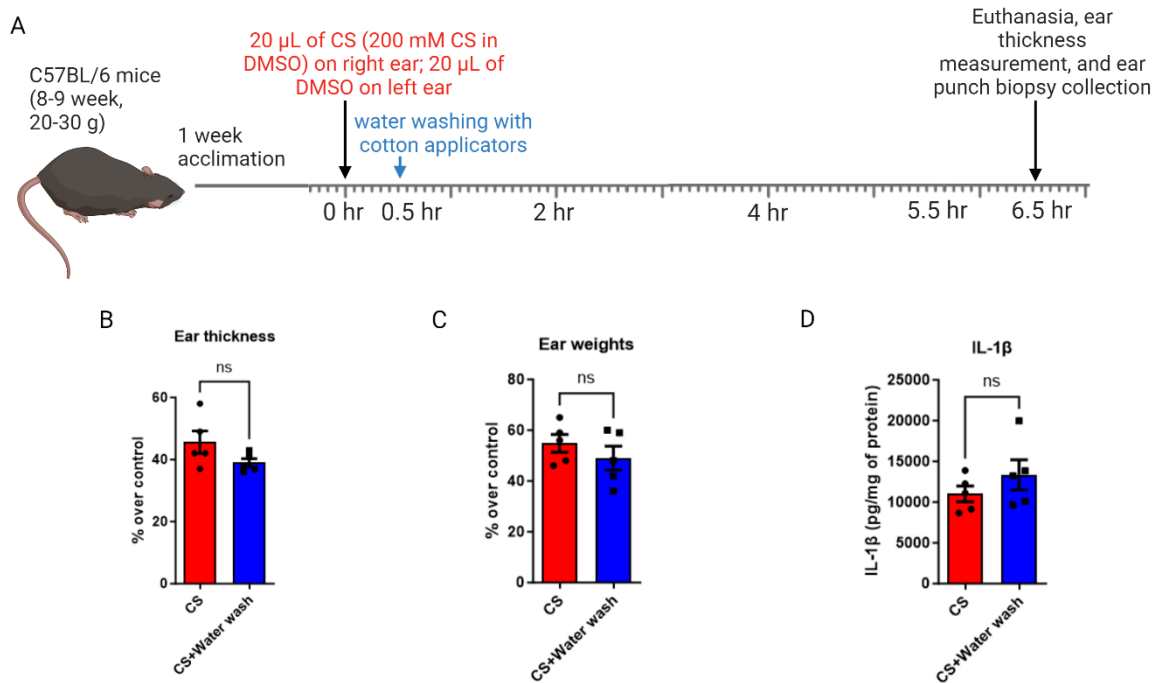

**Figure S3. Decontamination of CS tear gas exposure with water washing.** (A) Study paradigm. Right ears of C57BL/6 male mice were exposed to 20  $\mu$ L of 200 mM CS (dissolved in DMSO) and left ears to DMSO (vehicle, 20  $\mu$ L). At 6.5 hours post-CS exposure, mice were euthanized, ear thickness was measured, and ear punch biopsies were collected. (B-D) Ear thickness, ear punch biopsy weights, and pro-inflammatory cytokine (IL-1 $\beta$ ) assessments. Data were analyzed by Student's t-test. Data are presented as mean  $\pm$  SEM, n=5 per group. ns = non-significant.

samples (Figure S3).

**Table S1.** Development of TRPA1 inhibitor pipeline, species activity, and efficacy in human TRPA1

| Name                   | Species activity                               | Human IC <sub>50</sub> values (nM) | Developed by         | Ref                         |
|------------------------|------------------------------------------------|------------------------------------|----------------------|-----------------------------|
| HC-030031              | Mouse, rat, and human                          | 6200                               | Hydra Biosciences    | (McNamara et al., 2007)     |
| AP18                   | Mouse, rat, and human                          | 3100                               | Novartis             | (Petrus et al., 2007)       |
| ChemBridge-5861528     | Rat, and human                                 | 4900                               | Orion Pharma         | (Wei et al., 2009)          |
| A-967079               | Mouse, rat, rabbit, pig and human              | 67                                 | Abbott               | (McGaraughty et al., 2010)  |
| GRC17536               | Guinea pig and human                           | <10                                | Glenmark             | (India, 2014)               |
| AMG0902                | Mouse, rat, rabbit, pig, and human             | 131                                | Amgen                | (Lehto et al., 2016)        |
| BI01305834             | Guinea pig and human                           | 40                                 | Boehringer Ingelheim | (van den Berg et al., 2021) |
| BAY-390                | Rat and human                                  | 16                                 | Bayer                | (Mesch et al., 2023)        |
| GDC-0334               | Mouse, rat, guinea pig, and human              | 1.7                                | Genentech            | (Balestrini et al., 2021)   |
| GDC-6599 (compound 20) | Mouse, rat, guinea pig, rabbit, pig, and human | 0.9                                | Genentech            | (Terrett et al., 2021)      |

Additional investigational TRPA1 antagonists have been disclosed and discussed elsewhere (Achanta and Jordt, 2020; Chen and Terrett, 2020; Talavera et al., 2020).

## References

- Achanta S and Jordt SE (2020) Transient receptor potential channels in pulmonary chemical injuries and as countermeasure targets. *Ann N Y Acad Sci*.
- Balestrini A, Joseph V, Dourado M, Reese RM, Shields SD, Rouge L, Bravo DD, Chernov-Rogan T, Austin CD, Chen H, Wang L, Villemure E, Shore DGM, Verma VA, Hu B, Chen Y, Leong L, Bjornson C, Hotzel K, Gogineni A, Lee WP, Suto E, Wu X, Liu J, Zhang J, Gandham V, Wang J, Payandeh J, Ciferri C, Estevez A, Arthur CP, Kortmann J, Wong RL, Heredia JE, Doerr J, Jung M, Vander Heiden JA, Roose-Girma M, Tam L, Barck KH, Carano RAD, Ding HT, Brillantes B, Tam C, Yang X, Gao SS, Ly JQ, Liu L, Chen L, Liederer BM, Lin JH, Magnuson S, Chen J, Hackos DH, Elstrott J, Rohou A, Safina BS, Volgraf M, Bauer RN and Rioli-Blanco L (2021) A TRPA1 inhibitor suppresses neurogenic inflammation and airway contraction for asthma treatment. *J Exp Med* **218**.
- Chen H and Terrett JA (2020) Transient receptor potential ankyrin 1 (TRPA1) antagonists: a patent review (2015-2019). *Expert Opin Ther Pat* **30**:643-657.
- India GPL (2014) A Clinical Trial to Study the Effects GRC 17536 in Patients With Painful Diabetic Peripheral Neuropathy (Painful Extremities Due to Peripheral Nerve Damage in Diabetic Patients). in, ClinicalTrials.gov.
- Lehto SG, Weyer AD, Youngblood BD, Zhang M, Yin R, Wang W, Teffera Y, Cooke M, Stucky CL, Schenkel L, Geuns-Meyer S, Moyer BD, Wild KD and Gavva NR (2016) Selective antagonism of TRPA1 produces limited efficacy in models of inflammatory- and neuropathic-induced mechanical hypersensitivity in rats. *Molecular pain* **12**.
- McGarughty S, Chu KL, Perner RJ, Didomenico S, Kort ME and Kym PR (2010) TRPA1 modulation of spontaneous and mechanically evoked firing of spinal neurons in uninjured, osteoarthritic, and inflamed rats. *Molecular pain* **6**:14.
- McNamara CR, Mandel-Brehm J, Bautista DM, Siemens J, Deranian KL, Zhao M, Hayward NJ, Chong JA, Julius D, Moran MM and Fanger CM (2007) TRPA1 mediates formalin-induced pain. *Proc Natl Acad Sci U S A* **104**:13525-13530.
- Mesch S, Walter D, Laux-Biehlmann A, Basting D, Flanagan S, Miyatake Onozabal H, Baurle S, Pearson C, Jenkins J, Elves P, Hess S, Coelho AM, Rotgeri A, Bothe U, Nawaz S, Zollner TM and Steinmeyer A (2023) Discovery of BAY-390, a Selective CNS Penetrant Chemical Probe as Transient Receptor Potential Ankyrin 1 (TRPA1) Antagonist. *J Med Chem* **66**:1583-1600.
- Petrus M, Peier AM, Bandell M, Hwang SW, Huynh T, Olney N, Jegla T and Patapoutian A (2007) A role of TRPA1 in mechanical hyperalgesia is revealed by pharmacological inhibition. *Molecular pain* **3**:40.
- Talavera K, Startek JB, Alvarez-Collazo J, Boonen B, Alpizar YA, Sanchez A, Naert R and Nilius B (2020) Mammalian Transient Receptor Potential TRPA1 Channels: From Structure to Disease. *Physiol Rev* **100**:725-803.
- Terrett JA, Chen H, Shore DG, Villemure E, Larouche-Gauthier R, Dery M, Beaumier F, Constantineau-Forget L, Grand-Maitre C, Lepissier L, Ciblat S, Sturino C, Chen Y, Hu B, Lu A, Wang Y, Cridland AP, Ward SI, Hackos DH, Reese RM, Shields SD, Chen J, Balestrini A, Rioli-Blanco L, Lee WP, Liu J, Suto E, Wu X, Zhang J, Ly JQ, La H, Johnson K, Baumgardner M, Chou KJ, Rohou A, Rouge L, Safina BS, Magnuson S and Volgraf M (2021) Tetrahydrofuran-Based Transient Receptor Potential Ankyrin 1 (TRPA1) Antagonists: Ligand-Based Discovery, Activity in a Rodent Asthma Model, and Mechanism-of-Action via Cryogenic Electron Microscopy. *J Med Chem* **64**:3843-3869.
- van den Berg MPM, Nijboer-Brinksma S, Bos IST, van den Berge M, Lamb D, van Faassen M, Kema IP, Gosens R and Kistemaker LEM (2021) The novel TRPA1 antagonist BI01305834 inhibits ovalbumin-induced bronchoconstriction in guinea pigs. *Respir Res* **22**:48.

Wei H, Hamalainen MM, Saarnilehto M, Koivisto A and Pertovaara A (2009) Attenuation of mechanical hypersensitivity by an antagonist of the TRPA1 ion channel in diabetic animals. *Anesthesiology* **111**:147-154.
